# Supplementary material for: Integration of porous graphitic carbon and carbon fiber framework for ultrahigh sulfur-loading lithium–sulfur battery
Source: Royal Society of Chemistry journal article supplement (doi:10.1039/d1dt03709a), 2022-01-01
Supplement: d1dt03709a1.pdf [file d1dt03709a1.pdf]

## Supporting Information

### Integration of porous graphitic carbon and carbon fiber framework for ultrahigh sulfur-loading lithium-sulfur battery

Hui Chen, Hengfeng Hong, Xin Zhang, Yurong Zhang, Jingdong Liu  
and Yuanhui Zheng\*

College of Chemistry, Fuzhou University, Fuzhou, Fujian 350116, China.

\*Corresponding author: yuanhui.zheng@fzu.edu.cn

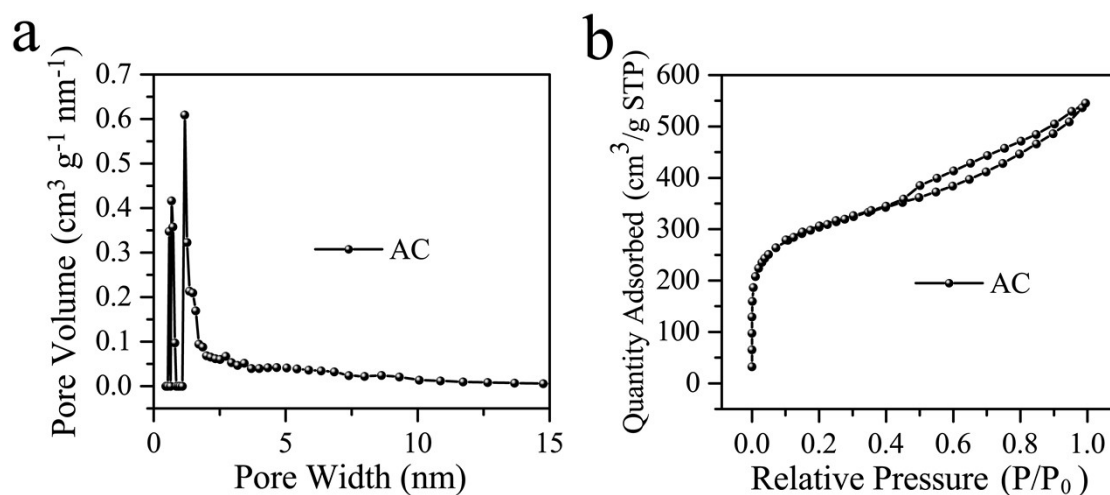

**Fig. S1** (a) pore size distribution and (b)  $\text{N}_2$  adsorption-desorption isotherm of AC.
